# Supplementary material for: Association between maternal and paternal employment and their children’s weight status and unhealthy behaviours: does it matter who the working parent is?
Source: Springer Nature journal article supplement (doi:10.1186/s12889-022-13735-3), 2022-07-12
Supplement: MOESM1 [file 23258890]

**Article title:** Association between maternal and paternal employment and their children's weight status and unhealthy behaviours: does it matter who the working parent is?

**Journal name:** BMC Public Health

**Authors' information:** Néboa Zozaya<sup>1</sup>, Juan Oliva-Moreno<sup>2</sup> and Laura Vallejo-Torres<sup>3</sup>

1. Universidad de Las Palmas de Gran Canaria, Department of Quantitative Methods in Economics and Management, Calle Saulo Torón, 4 Las Palmas de Gran Canaria, 35017. Las Palmas, Spain. Weber Economía y Salud, Calle Moreto 17, 28014 Madrid, Spain.

Corresponding author: [neboa.zozaya@weber.org.es](mailto:neboa.zozaya@weber.org.es)

2. Universidad de Castilla La Mancha, Department of Economic Analysis and Finance, Cobertizo de San Pedro Mártir, s/n, 45002 Toledo, Spain.

3. Universidad de Las Palmas de Gran Canaria, Department of Quantitative Methods in Economics and Management, Calle Saulo Torón, 4 Las Palmas de Gran Canaria, 35017 Las Palmas, Spain.

### Additional file 1. Tables

**Table S1.** Multilevel regression models on children obesity (Full models) Odds ratios

|                                | Model 1             | Model 2             | Model 3             | Model 4             |
|--------------------------------|---------------------|---------------------|---------------------|---------------------|
| Sex (boy)                      | 2.189***<br>(0.164) | 2.203***<br>(0.165) | 2.213***<br>(0.166) | 2.224***<br>(0.167) |
| Age                            | 0.859***<br>(0.017) | 0.856***<br>(0.016) | 0.858***<br>(0.018) | 0.856***<br>(0.018) |
| Only the father has a job      | 1.029<br>(0.086)    | 1.005<br>(0.084)    | 0.977<br>(0.082)    | 0.962<br>(0.081)    |
| Only the mother has a job      | 1.320**<br>(0.186)  | 1.259<br>(0.178)    | 1.231<br>(0.174)    | 1.188<br>(0.168)    |
| None of the parents have a job | 1.560***<br>(0.249) | 1.438**<br>(0.230)  | 1.363<br>(0.220)    | 1.285<br>(0.208)    |
| Spanish parents                | 0.837<br>(0.081)    | 0.847<br>(0.082)    | 0.839<br>(0.082)    | 0.847<br>(0.082)    |
| Number of siblings             | 1.061<br>(0.036)    | 1.058*<br>(0.036)   | 1.053<br>(0.036)    | 1.052<br>(0.036)    |
| Medium-low family affluence    |                     | 1.497***<br>(0.130) |                     | 1.418***<br>(0.124) |
| Missing_family affluence       |                     | 1.197*<br>(0.119)   |                     | 1.173<br>(0.117)    |
| Year 2014                      | 0.846<br>(0.088)    | 0.820*<br>(0.090)   | 0.904<br>(0.099)    | 0.879<br>(0.101)    |
| Region 2                       | 0.660**<br>(0.126)  | 0.675**<br>(0.127)  | 0.690**<br>(0.130)  | 0.702<br>(0.131)    |
| Region 3                       | 0.769<br>(0.200)    | 0.771<br>(0.199)    | 0.824<br>(0.212)    | 0.823<br>(0.211)    |
| Region 3                       | 0.850<br>(0.183)    | 0.852<br>(0.182)    | 0.856<br>(0.182)    | 0.859<br>(0.181)    |
| Region 5                       | 1.661**<br>(0.353)  | 1.662**<br>(0.348)  | 1.720***<br>(0.360) | 1.721***<br>(0.357) |
| Region 6                       | 0.449***<br>(0.114) | 0.451***<br>(0.113) | 0.466***<br>(0.117) | 0.467***<br>(0.116) |
| Region 7                       | 0.340***<br>(0.091) | 0.342***<br>(0.090) | 0.352***<br>(0.093) | 0.353***<br>(0.093) |
| Region 8                       | 0.775<br>(0.155)    | 0.774<br>(0.153)    | 0.772<br>(0.153)    | 0.772<br>(0.152)    |
| Region 9                       | 0.654<br>(0.152)    | 0.676<br>(0.155)    | 0.673<br>(0.154)    | 0.691<br>(0.157)    |
| Region 10                      | 0.759<br>(0.165)    | 0.772<br>(0.166)    | 0.784<br>(0.168)    | 0.795<br>(0.169)    |
| Region 11                      | 0.721<br>(0.150)    | 0.734<br>(0.151)    | 0.738<br>(0.152)    | 0.748<br>(0.153)    |
| Region 12                      | 0.618**<br>(0.134)  | 0.621**<br>(0.133)  | 0.645**<br>(0.138)  | 0.646**<br>(0.137)  |

|                                 |                     |                     |                     |                     |
|---------------------------------|---------------------|---------------------|---------------------|---------------------|
| Region 13                       | 0.539**<br>(0.136)  | 0.553**<br>(0.138)  | 0.578**<br>(0.144)  | 0.588**<br>(0.145)  |
| Region 14                       | 1.091<br>(0.228)    | 1.082<br>(0.223)    | 1.074<br>(0.221)    | 1.069<br>(0.218)    |
| Region 15                       | 0.538**<br>(0.131)  | 0.543**<br>(0.130)  | 0.557**<br>(0.134)  | 0.562**<br>(0.134)  |
| Region 16                       | 0.454***<br>(0.119) | 0.457***<br>(0.119) | 0.495***<br>(0.129) | 0.495***<br>(0.128) |
| Region 17                       | 0.445***<br>(0.130) | 0.451***<br>(0.130) | 0.452***<br>(0.130) | 0.457***<br>(0.131) |
| Region 18                       | 2.086***            | 2.225***            | 2.267***            | 2.380***            |
| Parents' high educational level |                     |                     | 0.657***<br>(0.076) | 0.677***<br>(0.079) |
| Parents' low educational level  |                     |                     | 1.373***<br>(0.122) | 1.334***<br>(0.119) |
| Missing educational level       |                     |                     | 1.189<br>(0.168)    | 1.192<br>(0.168)    |
| Constant                        | 0.251***<br>(0.080) | 0.223***<br>(0.071) | 0.235***<br>(0.084) | 0.210***<br>(0.075) |

Robust seeform in parentheses. \*\*\* p<0.01, \*\* p<0.05

**Table S2. Multilevel regression models on children obesity/overweight (Full models) Odds ratios**

|                                 | Model 1             | Model 2             | Model 3             | Model 4             |
|---------------------------------|---------------------|---------------------|---------------------|---------------------|
| Sex (boy)                       | 1.931***<br>(0.063) | 1.938***<br>(0.064) | 1.946***<br>(0.064) | 1.950***<br>(0.064) |
| Age                             | 0.891***<br>(0.008) | 0.890***<br>(0.008) | 0.885***<br>(0.008) | 0.885***<br>(0.008) |
| Only the father has a job       | 1.022<br>(0.039)    | 1.009<br>(0.038)    | 0.991<br>(0.038)    | 0.983<br>(0.037)    |
| Only the mother has a job       | 1.093<br>(0.075)    | 1.065<br>(0.073)    | 1.051<br>(0.072)    | 1.031<br>(0.071)    |
| None of the parents have a job  | 1.184**<br>(0.100)  | 1.134<br>(0.096)    | 1.096<br>(0.093)    | 1.063<br>(0.091)    |
| Spanish parents                 | 0.820***<br>(0.038) | 0.826***<br>(0.038) | 0.819***<br>(0.038) | 0.824***<br>(0.038) |
| Number of siblings              | 0.957**<br>(0.017)  | 0.955**<br>(0.017)  | 0.953***<br>(0.017) | 0.952***<br>(0.017) |
| Medium-low family affluence     |                     | 1.246***<br>(0.050) |                     | 1.205***<br>(0.049) |
| Missing_family affluence        |                     | 1.124***<br>(0.050) |                     | 1.109**<br>(0.049)  |
| Year 2014                       | 0.928<br>(0.049)    | 0.904*<br>(0.050)   | 0.940<br>(0.051)    | 0.917<br>(0.052)    |
| Region 2                        | 0.673***<br>(0.067) | 0.680***<br>(0.067) | 0.680***<br>(0.066) | 0.686***<br>(0.067) |
| Region 3                        | 0.755**<br>(0.101)  | 0.754**<br>(0.100)  | 0.773<br>(0.102)    | 0.771**<br>(0.101)  |
| Region 3                        | 0.907<br>(0.103)    | 0.907<br>(0.103)    | 0.899<br>(0.101)    | 0.899<br>(0.100)    |
| Region 5                        | 1.206<br>(0.147)    | 1.204<br>(0.146)    | 1.217<br>(0.146)    | 1.215<br>(0.145)    |
| Region 6                        | 0.703***<br>(0.083) | 0.706***<br>(0.083) | 0.712***<br>(0.083) | 0.713***<br>(0.082) |
| Region 7                        | 0.616***<br>(0.072) | 0.618***<br>(0.072) | 0.619***<br>(0.071) | 0.620***<br>(0.071) |
| Region 8                        | 0.846<br>(0.089)    | 0.845<br>(0.088)    | 0.833<br>(0.086)    | 0.833<br>(0.085)    |
| Region 9                        | 0.774**<br>(0.091)  | 0.784**<br>(0.092)  | 0.776**<br>(0.090)  | 0.784**<br>(0.090)  |
| Region 10                       | 0.748**<br>(0.085)  | 0.753**<br>(0.085)  | 0.751**<br>(0.084)  | 0.755**<br>(0.084)  |
| Region 11                       | 0.778**<br>(0.083)  | 0.784**<br>(0.083)  | 0.778**<br>(0.082)  | 0.783**<br>(0.082)  |
| Region 12                       | 0.884<br>(0.093)    | 0.887<br>(0.093)    | 0.890<br>(0.092)    | 0.892<br>(0.092)    |
| Region 13                       | 0.710***<br>(0.088) | 0.718***<br>(0.089) | 0.734**<br>(0.090)  | 0.739**<br>(0.090)  |
| Region 14                       | 1.075<br>(0.122)    | 1.073<br>(0.121)    | 1.047<br>(0.116)    | 1.047<br>(0.116)    |
| Region 15                       | 0.654***<br>(0.079) | 0.655***<br>(0.078) | 0.658***<br>(0.078) | 0.660***<br>(0.078) |
| Region 16                       | 0.655***<br>(0.080) | 0.655***<br>(0.079) | 0.672***<br>(0.081) | 0.672***<br>(0.080) |
| Region 17                       | 0.641***<br>(0.088) | 0.645***<br>(0.088) | 0.641***<br>(0.086) | 0.644***<br>(0.086) |
| Region 18                       | 1.336<br>(0.221)    | 1.384**<br>(0.227)  | 1.390**<br>(0.226)  | 1.429**<br>(0.232)  |
| Parents' high educational level |                     |                     | 0.785***<br>(0.038) | 0.798***<br>(0.039) |
| Parents' low educational level  |                     |                     | 1.202***<br>(0.051) | 1.183***<br>(0.050) |
| Missing educational level       |                     |                     | 0.998<br>(0.072)    | 0.999<br>(0.072)    |
| Constant                        | 1.253<br>(0.194)    | 1.172<br>(0.181)    | 1.368<br>(0.232)    | 1.284<br>(0.218)    |

Robust seeform in parentheses. \*\*\* p&lt;0.01, \*\* p&lt;0.05.

**Table S3. Multilevel regression models on children BMI (Full models) Coefficients**

|                                 | Model 1              | Model 2              | Model 3              | Model 4              |
|---------------------------------|----------------------|----------------------|----------------------|----------------------|
| Sex (boy)                       | 0.477***<br>(0.036)  | 0.480***<br>(0.036)  | 0.486***<br>(0.036)  | 0.487***<br>(0.036)  |
| Age                             | 0.549***<br>(0.010)  | 0.548***<br>(0.010)  | 0.541***<br>(0.011)  | 0.540***<br>(0.011)  |
| Only the father has a job       | 0.013<br>(0.042)     | -0.001<br>(0.042)    | -0.027<br>(0.042)    | -0.036<br>(0.042)    |
| Only the mother has a job       | 0.218***<br>(0.078)  | 0.189**<br>(0.078)   | 0.168**<br>(0.078)   | 0.148<br>(0.078)     |
| None of the parents have a job  | 0.258***<br>(0.098)  | 0.211**<br>(0.098)   | 0.164<br>(0.098)     | 0.131<br>(0.099)     |
| Spanish parents                 | -0.247***<br>(0.054) | -0.239***<br>(0.053) | -0.247***<br>(0.053) | -0.240***<br>(0.053) |
| Number of siblings              | -0.040**<br>(0.020)  | -0.042**<br>(0.020)  | -0.042**<br>(0.020)  | -0.043**<br>(0.020)  |
| Medium-low family affluence     |                      | 0.245***<br>(0.046)  |                      | 0.201***<br>(0.046)  |
| Missing_family affluence        |                      | 0.114**<br>(0.049)   |                      | 0.094<br>(0.049)     |
| Year 2014                       | -0.206***<br>(0.068) | -0.229***<br>(0.070) | -0.191***<br>(0.069) | -0.211***<br>(0.071) |
| Region 2                        | -0.510***<br>(0.126) | -0.497***<br>(0.125) | -0.497***<br>(0.123) | -0.488***<br>(0.123) |
| Region 3                        | -0.345**<br>(0.169)  | -0.344**<br>(0.168)  | -0.319<br>(0.166)    | -0.320<br>(0.165)    |
| Region 3                        | -0.287<br>(0.149)    | -0.285<br>(0.148)    | -0.301**<br>(0.146)  | -0.298**<br>(0.145)  |
| Region 5                        | 0.135<br>(0.163)     | 0.132<br>(0.161)     | 0.142<br>(0.159)     | 0.139<br>(0.158)     |
| Region 6                        | -0.420***<br>(0.151) | -0.416***<br>(0.149) | -0.408***<br>(0.147) | -0.405***<br>(0.146) |
| Region 7                        | -0.650***<br>(0.146) | -0.646***<br>(0.145) | -0.649***<br>(0.143) | -0.646***<br>(0.142) |
| Region 8                        | -0.277**<br>(0.136)  | -0.277**<br>(0.135)  | -0.300**<br>(0.133)  | -0.298**<br>(0.133)  |
| Region 9                        | -0.438***<br>(0.151) | -0.420***<br>(0.150) | -0.437***<br>(0.147) | -0.423***<br>(0.147) |
| Region 10                       | -0.232<br>(0.145)    | -0.222<br>(0.144)    | -0.227<br>(0.142)    | -0.219<br>(0.141)    |
| Region 11                       | -0.420***<br>(0.137) | -0.410***<br>(0.136) | -0.422***<br>(0.134) | -0.413***<br>(0.134) |
| Region 12                       | -0.158<br>(0.136)    | -0.155<br>(0.135)    | -0.154<br>(0.133)    | -0.151<br>(0.133)    |
| Region 13                       | -0.601***<br>(0.159) | -0.587***<br>(0.158) | -0.560***<br>(0.155) | -0.550***<br>(0.154) |
| Region 14                       | 0.028<br>(0.150)     | 0.025<br>(0.149)     | -0.009<br>(0.147)    | -0.009<br>(0.146)    |
| Region 15                       | -0.443***<br>(0.153) | -0.439***<br>(0.151) | -0.432***<br>(0.149) | -0.429***<br>(0.148) |
| Region 16                       | -0.361**<br>(0.152)  | -0.356**<br>(0.150)  | -0.329**<br>(0.148)  | -0.327**<br>(0.148)  |
| Region 17                       | -0.801***<br>(0.172) | -0.792***<br>(0.171) | -0.802***<br>(0.168) | -0.795***<br>(0.167) |
| Region 18                       | 0.512**<br>(0.222)   | 0.551**<br>(0.220)   | 0.560***<br>(0.217)  | 0.590***<br>(0.216)  |
| Parents' high educational level |                      |                      | -0.325***<br>(0.051) | -0.308***<br>(0.051) |
| Parents' low educational level  |                      |                      | 0.215***<br>(0.049)  | 0.197***<br>(0.049)  |
| Missing educational level       |                      |                      | -0.024<br>(0.087)    | -0.023<br>(0.087)    |
| Constant                        | 12.731***<br>(0.186) | 12.658***<br>(0.186) | 12.861***<br>(0.200) | 12.793***<br>(0.201) |

Robust seeform in parentheses. \*\*\* p<0.01, \*\* p<0.05

**Table S4.** Multilevel regression models on children weight status measured by Cole et al (Odds ratios)

|                                 | Obesity            |                     |                     |                     | Obesity + overweight |                     |                     |                     |
|---------------------------------|--------------------|---------------------|---------------------|---------------------|----------------------|---------------------|---------------------|---------------------|
|                                 | Model 1            | Model 2             | Model 3             | Model 4             | Model 1              | Model 2             | Model 3             | Model 4             |
| Only the father has a job       | 1.054<br>(0.100)   | 1.036<br>(0.099)    | 0.996<br>(0.095)    | 0.986<br>(0.095)    | 1.011<br>(0.038)     | 0.999<br>(0.038)    | 0.978<br>(0.037)    | 0.971<br>(0.037)    |
| Only the mother has a job       | 1.111<br>(0.191)   | 1.071<br>(0.184)    | 1.031<br>(0.178)    | 1.005<br>(0.173)    | 1.090<br>(0.074)     | 1.063<br>(0.073)    | 1.046<br>(0.071)    | 1.027<br>(0.070)    |
| None of the parents have a job  | 1.365<br>(0.258)   | 1.281<br>(0.244)    | 1.195<br>(0.229)    | 1.145<br>(0.220)    | 1.165<br>(0.097)     | 1.118<br>(0.094)    | 1.075<br>(0.091)    | 1.045<br>(0.088)    |
| Medium-low family affluence     |                    | 1.354***<br>(0.137) |                     | 1.278**<br>(0.130)  |                      | 1.234***<br>(0.050) |                     | 1.190***<br>(0.048) |
| Parents' high educational level |                    |                     | 0.586***<br>(0.082) | 0.599***<br>(0.084) |                      |                     | 0.757***<br>(0.037) | 0.768***<br>(0.038) |
| Parents' low educational level  |                    |                     | 1.277**<br>(0.131)  | 1.250**<br>(0.128)  |                      |                     | 1.194***<br>(0.050) | 1.176***<br>(0.050) |
| Spanish parents                 | 0.796**<br>(0.088) | 0.804**<br>(0.089)  | 0.798**<br>(0.089)  | 0.805<br>(0.089)    | 0.828***<br>(0.038)  | 0.833***<br>(0.038) | 0.827***<br>(0.038) | 0.832***<br>(0.038) |
| MOR (school)                    | 1.51               | 1.49                | 1.47                | 1.46                | 1.31                 | 1.30                | 1.29                | 1.28                |
| Wald Chi2 test                  | 142.2              | 152.6               | 171.2               | 177.7               | 412.8                | 440.8               | 477.8               | 496.5               |

Robust seeform in parentheses. \*\*\* p<0.01, \*\* p<0.05.

All models were adjusted for gender, age, region, number of siblings and year. Models 2 and 4 were also adjusted for the missing variables of the family's socioeconomic level. Models 3 and 4 were also adjusted for the missing variables of the parent's educational level. Only biparental families were considered.

## Additional file 2. HBSC questionnaire

### Family structure:

All families are different (for example, not everyone lives with both their parents, sometimes people live with just one parent, or they have two homes or live with two families) and we would like to know about yours. Please answer this first question for the home where you live all or most of the time and tick the people who live there.

| Adults                                                                      | Children                                                                                                                                                                                                                                                                     |
|-----------------------------------------------------------------------------|------------------------------------------------------------------------------------------------------------------------------------------------------------------------------------------------------------------------------------------------------------------------------|
| <input type="radio"/> Mother                                                | Please say how many brothers and sisters live here (including half, step or foster brothers and sisters). Please write in the number or write 0 (zero) if there are none. Please do <u>not</u> count yourself<br><br>How many brothers? _____<br><br>How many sisters? _____ |
| <input type="radio"/> Father                                                |                                                                                                                                                                                                                                                                              |
| <input type="radio"/> Stepmother (or father's girlfriend)                   |                                                                                                                                                                                                                                                                              |
| <input type="radio"/> Stepfather (or mother's boyfriend)                    |                                                                                                                                                                                                                                                                              |
| <input type="radio"/> Grandmother                                           |                                                                                                                                                                                                                                                                              |
| <input type="radio"/> Grandfather                                           |                                                                                                                                                                                                                                                                              |
| <input type="radio"/> I live in a foster home or children's home            |                                                                                                                                                                                                                                                                              |
| <input type="radio"/> Someone or somewhere else: please write it down _____ |                                                                                                                                                                                                                                                                              |

### Body mass:

How much do you weigh without clothes? \_\_\_\_\_

How tall are you without shoes? \_\_\_\_\_

### Parents' employment:

| Father                                                                                                                                                                                                                                                                                                                                              | Mother                                                                                                                                                                                                                                                                                                                                               |
|-----------------------------------------------------------------------------------------------------------------------------------------------------------------------------------------------------------------------------------------------------------------------------------------------------------------------------------------------------|------------------------------------------------------------------------------------------------------------------------------------------------------------------------------------------------------------------------------------------------------------------------------------------------------------------------------------------------------|
| <b>Does your father have a job?</b><br><input type="radio"/> Yes<br><input type="radio"/> No<br><input type="radio"/> Don't know<br><input type="radio"/> Don't know or don't see father                                                                                                                                                            | <b>Does your mother have a job?</b><br><input type="radio"/> Yes<br><input type="radio"/> No<br><input type="radio"/> Don't know<br><input type="radio"/> Don't know or don't see mother                                                                                                                                                             |
| <b>If YES, please say in what place he works</b><br><i>(for example: hospital, bank, restaurant)</i><br><br>_____<br><br><b>Please write down exactly what job he does there</b><br><i>(for example: teacher, bus driver)</i><br><br>_____                                                                                                          | <b>If YES, please say in what place she works</b><br><i>(for example: hospital, bank, restaurant)</i><br><br>_____<br><br><b>Please write down exactly what job she does there</b><br><i>(for example: teacher, bus driver)</i><br><br>_____                                                                                                         |
| <b>If NO, why does your father not have a job?</b><br><i>(Please tick the box that best describes the situation)</i><br><input type="radio"/> He is sick, or retired, or a student<br><input type="radio"/> He is looking for a job<br><input type="radio"/> He takes care of others, or is full-time at home<br><input type="radio"/> I don't know | <b>If NO, why does your mother not have a job?</b><br><i>(Please tick the box that best describes the situation)</i><br><input type="radio"/> She is sick, or retired, or a student<br><input type="radio"/> She is looking for a job<br><input type="radio"/> She takes care of others, or is full-time at home<br><input type="radio"/> don't know |



### Physical activity:

Physical activity is any activity that increases your heart rate and makes you get out of breath some of the time. Physical activity can be done in sports, school activities, playing with friends, or walking to school. Some examples of physical activity are running, brisk walking, rollerblading, biking, dancing, skateboarding, swimming, soccer, basketball, football, & surfing. [COUNTRY SPECIFIC EXAMPLES CAN BE GIVEN]  
For this next question, add up all the time you spent in physical activity each day.

**Over the past 7 days, on how many days were you physically active for a total of at least 60 minutes per day?**

| 0 days                | 1 day                 | 2 days                | 3 days                | 4 days                | 5 days                | 6 days                | 7 days                |
|-----------------------|-----------------------|-----------------------|-----------------------|-----------------------|-----------------------|-----------------------|-----------------------|
| <input type="radio"/> | <input type="radio"/> | <input type="radio"/> | <input type="radio"/> | <input type="radio"/> | <input type="radio"/> | <input type="radio"/> | <input type="radio"/> |

### Sedentary behaviour:

**About how many hours a day do you usually use a computer for chatting on-line, internet, emailing, homework etc. in your free time? Please tick one box for weekdays and one box for weekend.**

| Weekdays              |                             | Weekend               |                             |
|-----------------------|-----------------------------|-----------------------|-----------------------------|
| <input type="radio"/> | None at all                 | <input type="radio"/> | None at all                 |
| <input type="radio"/> | About half an hour a day    | <input type="radio"/> | About half an hour a day    |
| <input type="radio"/> | About 1 hour a day          | <input type="radio"/> | About 1 hour a day          |
| <input type="radio"/> | About 2 hours a day         | <input type="radio"/> | About 2 hours a day         |
| <input type="radio"/> | About 3 hours a day         | <input type="radio"/> | About 3 hours a day         |
| <input type="radio"/> | About 4 hours a day         | <input type="radio"/> | About 4 hours a day         |
| <input type="radio"/> | About 5 hours a day         | <input type="radio"/> | About 5 hours a day         |
| <input type="radio"/> | About 6 hours a day         | <input type="radio"/> | About 6 hours a day         |
| <input type="radio"/> | About 7 or more hours a day | <input type="radio"/> | About 7 or more hours a day |
